# Supplementary material for: Assessment of Interprofessional Collaborative Practices and Outcomes in Adults With Diabetes and Hypertension in Primary Care: A Systematic Review and Meta-analysis
Source: PubMed Central journal article supplement (PMC7881360; doi:10.1001/jamanetworkopen.2020.36725), 2021-02-12
Supplement: jamanetwopen-e2036725-s001.pdf [file jamanetwopen-e2036725-s001.pdf]

## Supplemental Online Content

Lee JK, McCutcheon LRM, Fazel MT, Cooley JH, Slack MK. Assessment of interprofessional collaborative practices and outcomes in adults with diabetes and hypertension in primary care: a systematic review and meta-analysis. *JAMA Netw Open*. 2021;4(2):e2036725.  
doi:10.1001/jamanetworkopen.2020.36725

**eMethods 1.** Search Strategy for Ovid MEDLINE ALL (1946 to March 02, 2018)

**eMethods 2.** Meta-analysis Supplemental Materials

**eTable.** Characteristics of the Studies Not Included in the Meta-analysis

**eFigure 1.** Association of ICP With A1C Stratified by Study Design

**eFigure 2.** Funnel Plot for Hemoglobin A1C

**eFigure 3.** Funnel Plot for Systolic Blood Pressure

**eFigure 4.** Funnel Plot for Diastolic Blood Pressure

This supplemental material has been provided by the authors to give readers additional information about their work.

## eMethods 1. Search strategy for Ovid MEDLINE(R) ALL (1946 to March 02, 2018).

Search conducted March 5, 2018.

|    |                                                                 |
|----|-----------------------------------------------------------------|
| 1  | exp Primary Health Care/                                        |
| 2  | General Practice/                                               |
| 3  | Family Practice/                                                |
| 4  | General Practitioners/                                          |
| 5  | Physicians, Primary Care/                                       |
| 6  | Physicians, Family/                                             |
| 7  | Primary Care Nursing/                                           |
| 8  | Community Health Services/                                      |
| 9  | Ambulatory Care Facilities/                                     |
| 10 | Ambulatory Care/                                                |
| 11 | Internal Medicine/                                              |
| 12 | internal medicine.tw.                                           |
| 13 | ((primary or ambulatory or community) adj3 care).tw.            |
| 14 | ((primary or ambulatory or community) adj3 healthcare).tw.      |
| 15 | ((primary or ambulatory or community) adj3 health service\$.tw. |
| 16 | (primary adj3 provider\$.tw.                                    |
| 17 | ((general or ambulatory or primary or family) adj3 pract\$.tw.  |
| 18 | generalist\$.tw.                                                |
| 19 | gp.tw.                                                          |
| 20 | gps.tw.                                                         |
| 21 | family health\$.tw.                                             |
| 22 | family medicine.tw.                                             |
| 23 | family physician\$.tw.                                          |
| 24 | family doctor\$.tw.                                             |
| 25 | aboriginal health centre\$.tw.                                  |
| 26 | community health center\$.tw.                                   |
| 27 | community health centre\$.tw.                                   |
| 28 | centre local de services.tw.                                    |
| 29 | clscs.tw.                                                       |
| 30 | communautaire\$.tw.                                             |
| 31 | community service center\$.tw.                                  |
| 32 | community service centre\$.tw.                                  |
| 33 | (nurse adj3 led clinic\$.tw.                                    |
| 34 | outpost nursing station\$.tw.                                   |
| 35 | or/1-34                                                         |

|    |                                  |
|----|----------------------------------|
| 36 | Patient Care Team/               |
| 37 | Cooperative Behavior/            |
| 38 | interprofessional relations/     |
| 39 | interdisciplinary communication/ |
| 40 | physician-nurse relations/       |
| 41 | Group Processes/                 |
| 42 | interprofessional\$.af.          |
| 43 | inter-professional\$.af.         |
| 44 | interdisciplinary.tw.            |
| 45 | inter-disciplinary.tw.           |
| 46 | multidisciplinary.tw.            |
| 47 | multi-disciplinary.tw.           |
| 48 | transdisciplinary.tw.            |
| 49 | trans-disciplinary.tw.           |
| 50 | cross-disciplinary.tw.           |
| 51 | multiprofessional\$.tw.          |
| 52 | multi-professional\$.tw.         |
| 53 | transprofessional\$.tw.          |
| 54 | trans-professional\$.tw.         |
| 55 | team\$.tw.                       |
| 56 | collaborat\$.tw.                 |
| 57 | shared care.tw.                  |
| 58 | (shared adj3 appointment\$.tw.   |
| 59 | or/36-58                         |
| 60 | triple aim.tw.                   |
| 61 | (35 and 59) or 60                |
| 62 | exp Hypertension/                |
| 63 | hypertens\$.tw.                  |
| 64 | Blood Pressure/                  |
| 65 | blood pressure.tw.               |
| 66 | bloodpressure.tw.                |
| 67 | Prehypertension/                 |
| 68 | prehypertension.tw.              |
| 69 | systolic.tw.                     |
| 70 | diastolic.tw.                    |
| 71 | exp DIABETES MELLITUS/           |
| 72 | diabet\$.tw.                     |
| 73 | glucose intolerance.tw.          |

|    |                                |
|----|--------------------------------|
| 74 | insulin resistance.tw.         |
| 75 | IDDM.tw.                       |
| 76 | NIDDM.tw.                      |
| 77 | T2DM.tw.                       |
| 78 | T1DM.tw.                       |
| 79 | or/62-78                       |
| 80 | 61 and 79                      |
| 81 | limit 80 to yr="2013 -Current" |
| 82 | limit 81 to english language   |

## eMethods 2. Meta-analysis supplemental materials

The general procedure used was to enter the data into CMA spreadsheet based on the data reported. The tabs at the bottom of the page provide information on the types of data formats that can be used. For any study reporting CI's without SD's, the SD was calculated from the CI interval using the following procedure: Calculate total width of CI, divide by 3.92, and multiply by the square root of N.

The data was used from only one arm in 2 studies, Chwastiak, 2017, and Deichmann, 2013 and were classified as pre-post studies.

| Study name               | Data format                              | Treatment Pre Mean | Treatment Pre SD | Treatment Post Mean | Treatment Post SD | Treatment Sample size | Control Pre Mean | Control Pre SD | Control Post Mean | Control Post SD | Control Sample size | Pre Post correlation | Effect direction |
|--------------------------|------------------------------------------|--------------------|------------------|---------------------|-------------------|-----------------------|------------------|----------------|-------------------|-----------------|---------------------|----------------------|------------------|
| 1 AAAlamry, 2013         | Paired groups (means, SD)                |                    |                  |                     |                   |                       |                  |                |                   |                 |                     |                      |                  |
| 2 ABacelo, 2010          | Means, p in each group                   |                    |                  |                     |                   |                       |                  |                |                   |                 |                     |                      |                  |
| 3 ABelue, 2014           | Paired groups (means, SD)                |                    |                  |                     |                   |                       |                  |                |                   |                 |                     |                      |                  |
| 4 ABray, 2013            | Means, SD in each group                  | 7.900              | 2.100            | 7.400               | 1.600             | 368                   | 7.900            | 2.200          | 7.700             | 1.900           | 359                 | 0.400                | Negative Po      |
| 5 AChwastiak, 2017       | Mean change, SD difference in each group |                    |                  |                     |                   |                       |                  |                |                   |                 |                     |                      |                  |
| 6 AChwastiak, 2017pp     | Paired groups (difference, p)            |                    |                  |                     |                   |                       |                  |                |                   |                 |                     |                      |                  |
| 7 ACohen, 2011           | Mean change, SD difference in each group |                    |                  |                     |                   |                       |                  |                |                   |                 |                     |                      |                  |
| 8 ACollen, 2014          | Paired groups (means, SD)                |                    |                  |                     |                   |                       |                  |                |                   |                 |                     |                      |                  |
| 9 ACuello-Marciano, 2013 | Means, SD in each group                  | 10.200             | 2.200            | 9.100               | 2.400             | 39                    | 9.400            | 2.300          | 9.600             | 2.300           | 39                  | 0.400                | Negative Po      |
| 10 ADeichmann, 2013      | Means, SD in each group                  | 8.400              | 2.200            | 7.200               | 1.500             | 121                   | 7.130            | 1.300          | 7.020             | 1.100           | 95                  | 0.400                | Negative Po      |
| 11 ADeichmann, 2013pp    | Paired groups (means, SD)                |                    |                  |                     |                   |                       |                  |                |                   |                 |                     |                      |                  |
| 12 ADePue, 2013          | Means, SD in each group                  | 9.800              | 2.200            | 9.300               | 2.000             | 104                   | 9.600            | 2.200          | 10.000            | 2.300           | 164                 | 0.400                | Negative Po      |
| 13 AEdelman, 2010        | Independent groups (difference, SD)      |                    |                  |                     |                   |                       |                  |                |                   |                 |                     |                      |                  |
| 14 AFamk, 2013           | Paired groups (means, p)                 |                    |                  |                     |                   |                       |                  |                |                   |                 |                     |                      |                  |
| 15 AGilstrap, 2013B      | Paired groups (means, p)                 |                    |                  |                     |                   |                       |                  |                |                   |                 |                     |                      |                  |
| 16 AGoyer, 2013          | Independent groups (means, SD's)         |                    |                  |                     |                   |                       |                  |                |                   |                 |                     |                      |                  |
| 17 AHasrabala, 2015      | Paired groups (means, p)                 |                    |                  |                     |                   |                       |                  |                |                   |                 |                     |                      |                  |
| 18 ALiao, 2014           | Mean change, SD difference in each group |                    |                  |                     |                   |                       |                  |                |                   |                 |                     |                      |                  |
| 19 ALiou, 2014           | Means, SD in each group                  | 8.300              | 1.200            | 7.600               | 1.100             | 54                    | 8.100            | 1.200          | 8.100             | 1.300           | 41                  | 0.400                | Negative Po      |
| 20 AMAntos, 2004         | Means, SD in each group                  | 11.600             | 1.300            | 9.800               | 1.900             | 48                    | 11.100           | 1.100          | 10.800            | 1.500           | 34                  | 0.400                | Negative Po      |
| 21 AMajumdar, 2003       | Cohort 2x2 (E-vent)                      |                    |                  |                     |                   |                       |                  |                |                   |                 |                     |                      |                  |
| 22 AMartin, 2015         | Paired groups (means, p)                 |                    |                  |                     |                   |                       |                  |                |                   |                 |                     |                      |                  |
| 23 AMohtar, 2016         | Paired groups (means, SD)                |                    |                  |                     |                   |                       |                  |                |                   |                 |                     |                      |                  |
| 24 ANagepkek, 2018       | Paired groups (means, p)                 |                    |                  |                     |                   |                       |                  |                |                   |                 |                     |                      |                  |
| 25 AParker, 2016         | Means, SD in each group                  | 10.500             | 2.140            | 9.750               | 2.400             | 32                    | 8.300            | 2.010          | 8.270             | 1.950           | 45                  | 0.400                | Negative Po      |
| 26 APerez-Nieto, 2011    | Mean change, SD difference in each group |                    |                  |                     |                   |                       |                  |                |                   |                 |                     |                      |                  |
| 27 AProvost, 2017        | Matched 2x2 (All cells)                  |                    |                  |                     |                   |                       |                  |                |                   |                 |                     |                      |                  |
| 28 ARanti, 2016          | Means, SD in each group                  | 8.400              | 1.950            | 8.300               | 1.950             | 471                   | 8.400            | 1.830          | 8.500             | 2.040           | 417                 | 0.400                | Negative Po      |
| 29 ASchouten, 2010       | Means, SD in each group                  | 7.500              | 1.300            | 7.200               | 1.200             | 607                   | 7.500            | 1.200          | 7.200             | 1.200           | 1254                | 0.400                | Negative Po      |
| 30 ASingh-Franco, 2013   | Paired groups (means, p)                 |                    |                  |                     |                   |                       |                  |                |                   |                 |                     |                      |                  |
| 31 ATang, 2013           | Means, SD in each group                  | 9.240              | 1.950            | 8.100               | 1.680             | 202                   | 9.280            | 1.740          | 8.330             | 1.810           | 213                 | 0.400                | Negative Po      |
| 32 ATaylor, 2010         | Means, SD difference in each group       |                    |                  |                     |                   |                       |                  |                |                   |                 |                     |                      |                  |

The next step was to select the model to be used, random or fixed, and examine the data output to be used for the forest plot.

| Model  | Study name          | Total N | Std diff in means | Standard error | Variance | Lower limit | Upper limit | Z-Value | p-Value |
|--------|---------------------|---------|-------------------|----------------|----------|-------------|-------------|---------|---------|
| Fixed  | AAAlamry, 2013      | 41      | -0.798            | 0.196          | 0.039    | -1.183      | -0.413      | -4.064  | 0.000   |
| Random | ABacelo, 2010       | 307     | 0.133             | 0.119          | 0.014    | -0.365      | 0.100       | -1.119  | 0.263   |
| Random | ABelue, 2014        | 98      | -0.033            | 0.117          | 0.014    | -0.262      | 0.196       | -0.284  | 0.776   |
| Random | ABray, 2013         | 727     | -0.171            | 0.074          | 0.006    | -0.317      | -0.025      | -2.301  | 0.021   |
| Random | AChwastiak, 2017    | 148     | -0.221            | 0.083          | 0.007    | -0.384      | -0.058      | -2.657  | 0.008   |
| Random | ACohen, 2011        | 99      | -0.172            | 0.201          | 0.041    | -0.566      | 0.223       | -0.852  | 0.394   |
| Random | ACollen, 2014       | 95      | -0.303            | 0.141          | 0.020    | -1.179      | -0.627      | -4.405  | 0.000   |
| Random | ACuello-Ma, 2013    | 78      | -0.553            | 0.231          | 0.053    | -1.005      | -0.101      | -2.397  | 0.017   |
| Random | AEdelman, 2010      | 121     | -0.649            | 0.110          | 0.012    | -0.864      | -0.434      | -5.924  | 0.000   |
| Random | ADePue, 2013        | 268     | -0.320            | 0.126          | 0.016    | -0.567      | -0.073      | -2.536  | 0.011   |
| Random | AEdelman, 2010      | 229     | -0.335            | 0.137          | 0.019    | -1.203      | -0.666      | -4.821  | 0.000   |
| Random | AFamk, 2013         | 1032    | -0.103            | 0.031          | 0.001    | -0.164      | -0.042      | -3.291  | 0.001   |
| Random | AGilstrap, 2013B    | 43      | -0.411            | 0.159          | 0.025    | -0.723      | -0.100      | -2.591  | 0.010   |
| Random | AGoyer, 2013        | 98      | -0.259            | 0.203          | 0.041    | -0.657      | 0.138       | -1.278  | 0.201   |
| Random | AHasrabala, 2015    | 148     | -0.200            | 0.083          | 0.007    | -0.363      | -0.038      | -2.413  | 0.016   |
| Random | ALiao, 2014         | 2144    | 0.195             | 0.043          | 0.002    | -0.280      | -0.110      | 4.507   | 0.000   |
| Random | ALiou, 2014         | 95      | -0.588            | 0.211          | 0.045    | -1.003      | -0.174      | -2.781  | 0.005   |
| Random | AMAntos, 2004       | 82      | -0.842            | 0.234          | 0.055    | -1.299      | -0.384      | -3.603  | 0.000   |
| Random | AMajumdar, 2003     | 207     | 0.164             | 0.212          | 0.045    | -0.253      | 0.580       | 0.771   | 0.441   |
| Random | AMartin, 2015       | 19      | -0.794            | 0.269          | 0.073    | -1.312      | -0.256      | -2.909  | 0.004   |
| Random | AMohtar, 2016       | 89      | -0.042            | 0.116          | 0.013    | -0.270      | 0.185       | -0.362  | 0.718   |
| Random | ANagepkek, 2018     | 221     | -0.064            | 0.067          | 0.005    | -0.196      | 0.068       | -0.943  | 0.345   |
| Random | AParker, 2016       | 77      | 0.334             | 0.233          | 0.054    | -0.791      | 0.122       | -1.437  | 0.151   |
| Random | APerez-Nieto, 2011  | 63      | -0.806            | 0.262          | 0.069    | -1.320      | -0.292      | -3.076  | 0.002   |
| Random | AProvost, 2017      | 992     | -0.156            | 0.042          | 0.002    | -0.239      | -0.074      | -3.722  | 0.000   |
| Random | AFamk, 2013         | 888     | -0.100            | 0.067          | 0.005    | -0.232      | 0.032       | -1.482  | 0.136   |
| Random | ASchouten, 2010     | 1861    | 0.000             | 0.049          | 0.002    | -0.097      | 0.097       | 0.000   | 1.000   |
| Random | ASingh-Franco, 2013 | 114     | -0.236            | 0.096          | 0.009    | -0.484      | -0.109      | -3.097  | 0.002   |
| Random | ATang, 2013         | 415     | -0.109            | 0.089          | 0.010    | -0.301      | 0.084       | -1.106  | 0.269   |
| Random | ATavelia, 2010      | 109     | -0.634            | 0.197          | 0.039    | -1.020      | -0.249      | -3.225  | 0.001   |
| Random | ATaylor, 2010       | 39      | -0.540            | 0.326          | 0.106    | -1.180      | 0.099       | -1.657  | 0.097   |

The moderator variable was identified (baseline A1C group) and applied to the analysis. No mean baseline mean HA1c was provided in Provost, 2017. The study was included in the <8 group because 63% of the sample had an HA1c less than 7. A weighted mean for baseline A1C was calculated for each A1C group.



**eTable. Characteristics of the studies not included in the meta-analysis**

| Source                                               | Study design         | Setting                                  | Total No. <sup>a</sup> | Age mean (SD), y | % Male       | Duration, months        | Outcome measures                | Team members (No. of professions in team) <sup>b</sup>                                                               | Main ICP team features or process (name of intervention program/model if specified OR other notable specifics) <sup>c</sup>                                    |
|------------------------------------------------------|----------------------|------------------------------------------|------------------------|------------------|--------------|-------------------------|---------------------------------|----------------------------------------------------------------------------------------------------------------------|----------------------------------------------------------------------------------------------------------------------------------------------------------------|
| <b>Randomized clinical trials (RCTs)</b>             |                      |                                          |                        |                  |              |                         |                                 |                                                                                                                      |                                                                                                                                                                |
| Hutchison et al, <sup>1</sup> 2014 United States     | RCT <sup>d</sup>     | Volunteer driven community health center | 124                    | Not reported     | Not reported | I: 24 + follow-up at 36 | HbA <sub>1c</sub>               | Physician/doct or of nursing practice; clinical pharmacist; NP; physician; students (pre-medical, pharmacy, nursing) | Students had team building activities; co-location                                                                                                             |
|                                                      |                      |                                          |                        |                  |              |                         | SBP                             |                                                                                                                      |                                                                                                                                                                |
|                                                      |                      |                                          |                        |                  |              |                         | DBP                             |                                                                                                                      |                                                                                                                                                                |
| Katon et al, <sup>2</sup> 2004 United States         | RCT <sup>d</sup>     | Ambulatory care clinics                  | 329                    | I: 58.6 (11.8)   | I: 34.       | 12                      | HbA <sub>1c</sub>               | Physician; nurse; psychologist; psychiatrist                                                                         | CPA; co-location; shared EMR; face-to-face (Individualized-stepped-care depression treatment program) <sup>e,f,g</sup>                                         |
|                                                      |                      |                                          |                        | C: 58.1 (12.0)   | C: 35.2      |                         |                                 |                                                                                                                      |                                                                                                                                                                |
| Lin et al, <sup>3</sup> 2014 United States           | RCT <sup>d</sup>     | Group health primary care clinics        | 214                    | I: 57.4 (10.5)   | I: 52        | 12 + follow-up at 12    | HbA <sub>1c</sub>               | Physician; medical consultant; patients; psychiatric consultant; TEAMcare nurse care managers                        | Weekly case reviews; shared EMRs; co-location; face-to-face communication <sup>e,f,g,h</sup>                                                                   |
|                                                      |                      |                                          |                        | C: 56.3 (12.1)   | C: 44        |                         | SBP                             |                                                                                                                      |                                                                                                                                                                |
| <b>Prospective cohort studies</b>                    |                      |                                          |                        |                  |              |                         |                                 |                                                                                                                      |                                                                                                                                                                |
| Tobe et al, <sup>4</sup> 2014 Canada                 | Prospective cohort   | Ambulatory care clinic/ center/ office   | 2855                   | 64.5 (12.1)      | 44           | 9                       | SBP<br>DBP                      | Physician; community pharmacists; nurse; NP                                                                          | IP group educational sessions; shared EMRs; regular team meetings, teleconferences, email; face-to-face communication; practice-based tools <sup>e,f,g,h</sup> |
| <b>Retrospective cohort studies</b>                  |                      |                                          |                        |                  |              |                         |                                 |                                                                                                                      |                                                                                                                                                                |
| De La Rosa et al, <sup>5</sup> 2020 United States    | Retrospective cohort | Family Practice Center                   | 119                    | I: 58<br>C: 59   | Not reported | 12                      | HbA <sub>1c</sub><br>BP         | Physician; medical assistants; medical students; nursing students                                                    | Interactive teamwork led by attending physician with nursing students serving as case managers                                                                 |
| Reiss-Brennan et al, <sup>6</sup> 2016 United States | Retrospective cohort | Health Systems Primary Care Clinics      | 113<br>452             | 56.1             | 39.81        | 36                      | HbA <sub>1c</sub><br>SBP<br>DBP | Primary care physician; clinic managers; medical support staff; mental health specialists; nurse care managers       | Shared EMR; co-location (also established protocols, knowledge of team roles, use of decision support tools, standard assessment.)                             |

| Prospective pre-post studies                            |                                     |                                                                                 |       |                                  |                    |                         |                                 |                                                                                                              |                                                                                                                                                                                                               |
|---------------------------------------------------------|-------------------------------------|---------------------------------------------------------------------------------|-------|----------------------------------|--------------------|-------------------------|---------------------------------|--------------------------------------------------------------------------------------------------------------|---------------------------------------------------------------------------------------------------------------------------------------------------------------------------------------------------------------|
| Fortuna, <sup>7</sup> 2015<br>United States             | Prospective pre-post                | Urban internal medicine practice                                                | 13404 | Not reported                     | 44.8               | 42                      | BP                              | Physician; pharmacist; nurse                                                                                 | Co-management by pharmacist (patient and physician education, self-management for medication adherence) and RN (intensive self-management education, BP monitoring, reports to physicians) <sup>f,i</sup>     |
| Retrospective pre-post studies                          |                                     |                                                                                 |       |                                  |                    |                         |                                 |                                                                                                              |                                                                                                                                                                                                               |
| Otero-Sabogal et al, <sup>8</sup> 2010<br>United States | Retrospective pre-post              | Community Health Center                                                         | 114   | 35                               | 30.70              | Up to 24                | HbA <sub>1c</sub><br>SBP<br>DBP | Physician; CHW; social worker; CDEs (profession unspecified)                                                 | Group patient educational sessions; Transforming primary care practice to PCMH; shared-medical appointments or group visits; co-location; face-to-face communication (Healthfirst Model) <sup>e,f,g,h,i</sup> |
| Rossum et al, <sup>9</sup> 2017<br>United States        | Retrospective pre-post              | Group-model; 18 care systems and 172 clinics in rural, urban, suburban settings | 3609  | 60 (12)                          | 62                 | Mean (range): 11 (1-26) | HbA <sub>1c</sub><br>SBP<br>DBP | Physician; care manager; psychiatrist                                                                        | Weekly meeting for case reviews <sup>j</sup> ; co-location; telecommunication/telemedicine; electronic care management tracking system                                                                        |
| Edward set al, <sup>10</sup> 2019<br>United States      | Retrospective pre-post              | Veteran Affairs primary care clinics                                            | 44527 | I: 59.3 (15.2)<br>C: 61.8 (15.3) | I: 83.6<br>C: 91.6 | 48                      | HbA <sub>1c</sub>               | Physician; NP; pharmacist; psychologist trainees                                                             | IP education; shared EMRs; co-location (CoEPCE, an initiative designed to promote IP education)                                                                                                               |
| Hull et al, <sup>11</sup> 2014<br>United Kingdom        | Retrospective pre-post <sup>d</sup> | Networks of Ambulatory care practices                                           | 41210 | Not reported                     | Not reported       | 36                      | HbA <sub>1c</sub>               | General Practitioner; care coordinator; community-based diabetes specialist nurses; consultant diabetologist | Joint IP or group patient educational sessions; shared EMRs; co-location <sup>e,g,h</sup>                                                                                                                     |

Abbreviations: CDE, board certified diabetes educator; CoEPCE, centers of excellence in primary care education; CPA, collaborative practice agreement; DBP, diastolic blood pressure; EMR, electronic medical record; HbA<sub>1c</sub>, hemoglobin A<sub>1c</sub>; ICP, interprofessional collaborative practice; IP, interprofessional; NP, nurse practitioner; PCMH, patient-centered medical home; RCT, randomized clinical trial; RN, registered nurse, SBP, systolic blood pressure; SD, standard deviation; TEAMcare, treatment, enhancement, activation, and motivation care.

<sup>a</sup> Total number of enrolled patients.

<sup>b</sup> First team member listed represents the primary care professional who served the gatekeeper functions of the "primary care provider".

<sup>c</sup> Data reported descriptively as each manuscript described/defined the interprofessional team/features/processes and based on the predetermined data extraction categories used in this systematic review.

<sup>d</sup> Patient-level.

<sup>e</sup> Patient education/counseling.

<sup>f</sup> Medication management.

<sup>g</sup> Chronic disease management.

<sup>h</sup> Health promotion/disease prevention.

<sup>i</sup> Adherence support.

<sup>j</sup> Pre-post study comparing 2 independent groups before and after the intervention (before-and-after study).



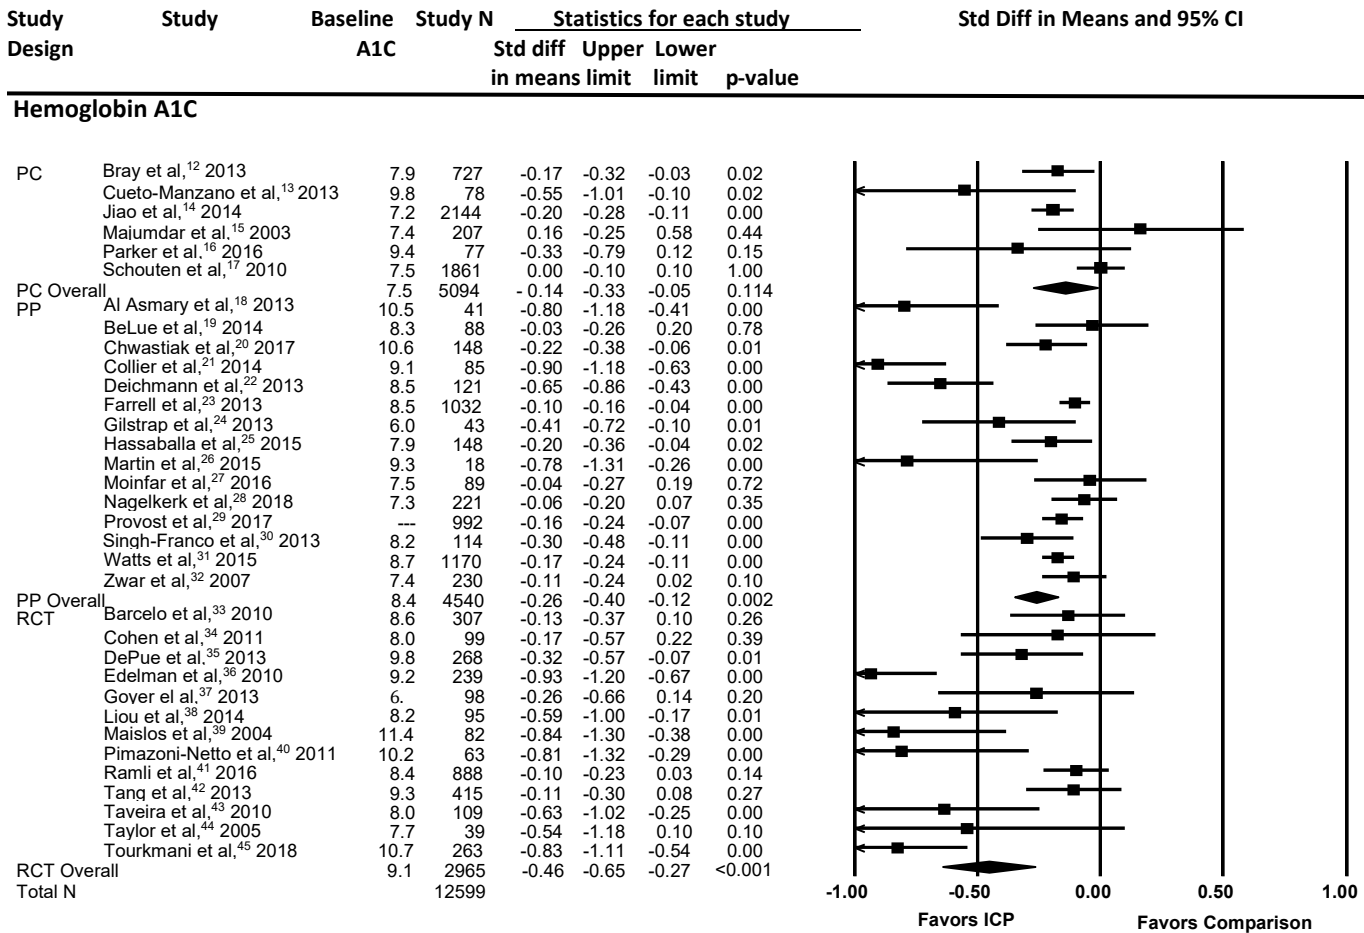

**Figure 1. Association of ICP with A1C stratified by study design**

Std diff = standard difference; CI = confidence interval; ICP = Interprofessional Collaborative Practice; PC = prospective cohort studies; PP = pre-post studies; RC = retrospective cohort study; RCT = randomized control trial; Total N for SBP=35,668; Total N for DBP=35,656; the overall SMD for SBP=-0.31, 95% CI, -0.46 to -0.17,  $p<0.001$ ; the overall SMD for DBP=-0.28, 95% CI, -0.42 to -0.14,  $p<0.001$ . For SBP, the SMD for the RC study was less than the SMD for PP studies ( $p=0.021$ ) and RCTs ( $p=0.015$ ) but not different from PC studies ( $p=0.286$ ). For DBP, the SMD for RC study was statistically less than for PP studies ( $<0.001$ ) and RCTs ( $p=0.006$ ), but not different from PC studies ( $p=0.387$ ). For both SBP and DBP there was no difference between the PC, PP, or RCT groups ( $p>0.270$ ). Heterogeneity  $I^2=95.4%$  for SBP and  $97.2%$  for DBP.

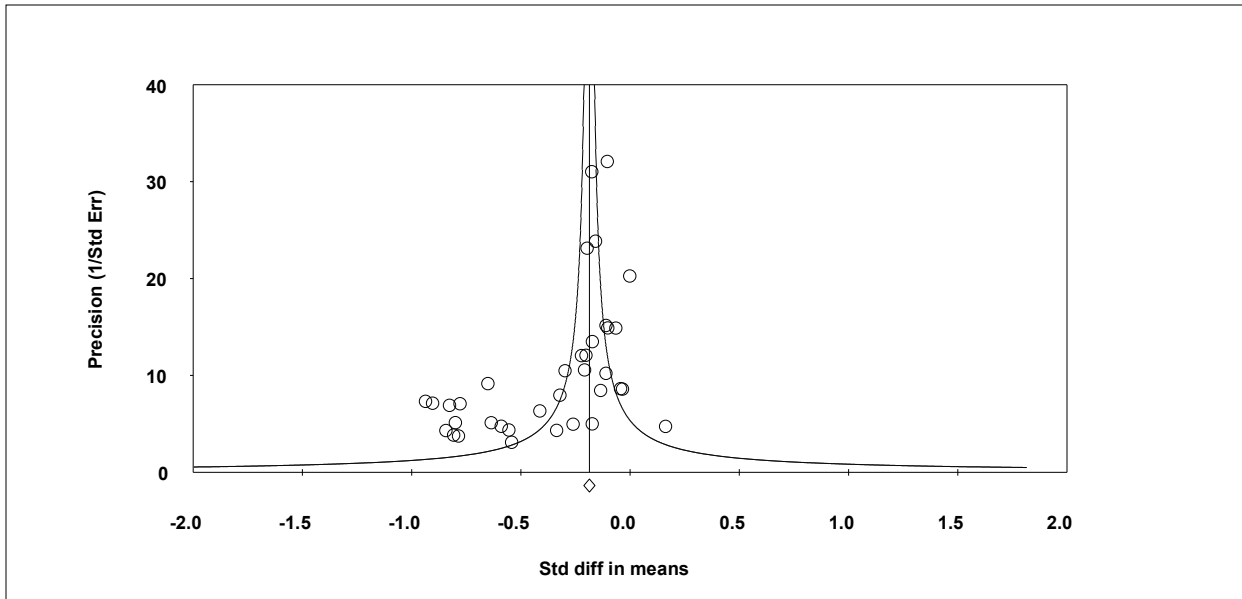

**eFigure 2. Funnel plot for hemoglobin A1C**

Std diff = standard difference; Std Err = standard error; The p-value for Kendall's tau was 0.002.

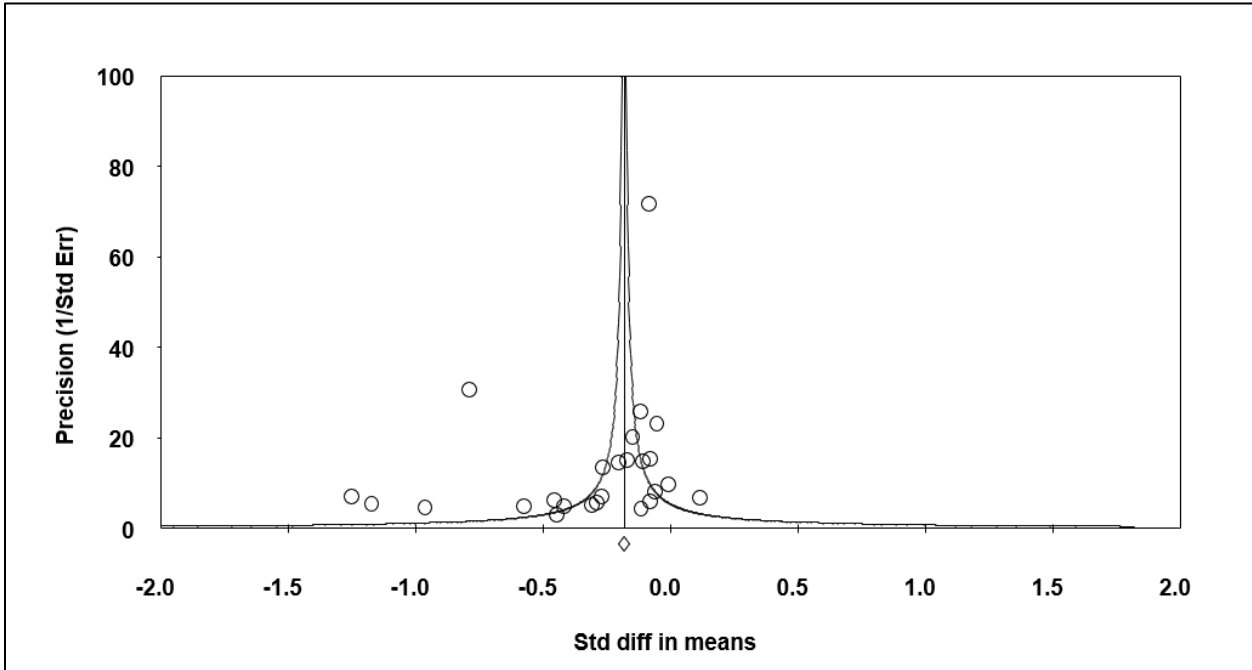

**eFigure 3. Funnel plot for systolic blood pressure**

Std diff = standard difference, Std Err = standard error. The p-value for Kendall's tau was 0.008, indicating that publication bias was likely present in this group of studies.

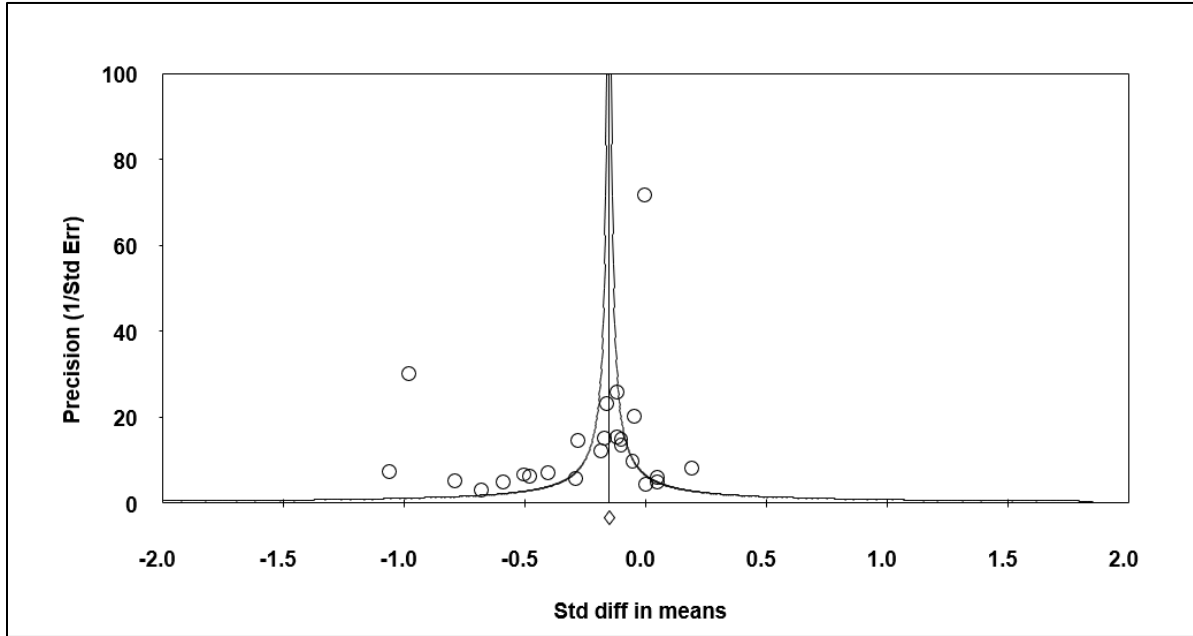

**eFigure 4. Funnel plot for diastolic blood pressure**

Std diff = standard difference, Std err = standard error. The p-value for Kendall's tau was 0.137, indicating that publication bias was not likely in this group of studies.

## eReferences

1. Hutchison RJ. Treating diabetes in underserved populations using an interprofessional care team. *J Interprof Care*. 2014;28(6):568-569.
2. Katon WJ, Von Korff M, Lin EH, et al. The Pathways Study: a randomized trial of collaborative care in patients with diabetes and depression. *Arch Gen Psychiatry*. 2004;61(10):1042-1049.
3. Lin EH, Von Korff M, Peterson D, Ludman EJ, Ciechanowski P, Katon W. Population targeting and durability of multimorbidity collaborative care management. *Am J Manag Care*. 2014;20(11):887-895.
4. Tobe SW, Moy Lum-Kwong M, Von Sychowski S, Kandukur K, Kiss A, Flintoft V. Hypertension management initiative prospective cohort study: comparison between immediate and delayed intervention groups. *J Hum Hypertens*. 2014;28(1):44-50.
5. De La Rosa M, Pitts S, Chen PH. An interprofessional collaboration of care to improve clinical outcomes for patients with diabetes. *J Interprof Care*. 2020;34(2):269-271.
6. Reiss-Brennan B, Brunisholz KD, Dredge C, et al. Association of integrated team-based care with health care quality, utilization, and cost. *JAMA*. 2016;316(8):826-834.
7. Fortuna RJ, Nagel AK, Rose E, et al. Effectiveness of a multidisciplinary intervention to improve hypertension control in an urban underserved practice. *J Am Soc Hypertens*. 2015;9(12):966-974.
8. Otero-Sabogal R, Arretz D, Siebold S, et al. Physician-community health worker partnering to support diabetes self-management in primary care. *Qual Prim Care*. 2010;18(6):363-372.
9. Rossom RC, Solberg LI, Magnan S, et al. Impact of a national collaborative care initiative for patients with depression and diabetes or cardiovascular disease. *General Hospital Psychiatry*. 2017;44:77-85.
10. Edwards ST, Hooker ER, Brienza R, et al. Association of a multisite interprofessional education initiative with quality of primary care. *JAMA Netw Open*. 2019;2(11):e1915943.
11. Hull S, Chowdhury TA, Mathur R, Robson J. Improving outcomes for patients with type 2 diabetes using general practice networks: a quality improvement project in east London. *BMJ Quality & Safety*. 2014;23(2):171-176.
12. Bray P, Cummings DM, Morrissey S, et al. Improved outcomes in diabetes care for rural African Americans. *Ann Fam Med*. 2013;11(2):145-150.
13. Cueto-Manzano AM, Martinez-Ramirez HR, Cortes-Sanabria L. Comparison of primary health-care models in the management of chronic kidney disease. *Kidney International Supplements*. 2013;3(2):210-214.
14. Jiao FF, Fung CS, Wong CK, et al. Effects of the multidisciplinary Risk Assessment and Management Program for Patients With Diabetes Mellitus (RAMP-DM) on biomedical outcomes, observed cardiovascular events and cardiovascular risks in primary care: a longitudinal comparative study. *Cardiovasc Diabetol*. 2014;13:127.
15. Majumdar SR, Guirguis LM, Toth EL, Lewanczuk RZ, Lee TK, Johnson JA. Controlled trial of a multifaceted intervention for improving quality of care for rural patients with type 2 diabetes. *Diabetes Care*. 2003;26(11):3061-3066.
16. Parker RA, Hook LD, Jones ME. Glycemic control: can nurse practitioners on interprofessional collaborative practice teams enhance clinical outcomes? *J Am Assoc Nurse Pract*. 2016;28(12):652-658.
17. Schouten LM, Niessen LW, van de Pas JW, Grol RP, Hulscher ME. Cost-effectiveness of a quality improvement collaborative focusing on patients with diabetes. *Med Care*. 2010;48(10):884-891.
18. Al Asmary SM, Al-Harbi T, Tourkmani AM, et al. Impact of integrated care program on glycemic control and cardiovascular risk in adult patients with type 2 diabetes. *J Clin Outcomes Manage*. 2013;20(8):356-363.
19. Belue R, Figaro MK, Peterson J, Wilds C, William P. The diabetes healthy outcomes program: results of free health care for uninsured at a federally qualified community health center. *J Prim Care Community Health*. 2014;5(1):4-8.
20. Chwastiak LA, Jackson SL, Russo J, et al. A collaborative care team to integrate behavioral health care and treatment of poorly-controlled type 2 diabetes in an urban safety net primary care clinic. *Gen Hosp Psychiatry*. 2017;44:10-15.
21. Collier IA, Baker DM. Implementation of a pharmacist-supervised outpatient diabetes treatment clinic. *Am J Health-Syst Pharm*. 2014;71(1):27-36.
22. Deichmann RE, Hebert AM, Harmeyer ED, Cazabon P, Chavis E. Effects of a diabetes boot camp on hemoglobin a1c levels. *Ochsner J*. 2013;13(2):194-199.
23. Farrell P, Barnaby S, Galarza T, et al. Population management of diabetes in a high-need urban community in the Bronx: the experience of Montefiore Medical Center. *Diabetes Educator*. 2013;39(4):515-522.
24. Gilstrap LG, Malhotra R, Peltier-Saxe D, et al. Community-based primary prevention programs decrease the rate of metabolic syndrome among socioeconomically disadvantaged women. *J Womens Health (Larchmt)*. 2013;22(4):322-9.

25. Hassaballa I, Ebekozién O, Ogunbadero A, et al. Evaluation of a diabetes care coordination program for African-American women living in public housing. *J Clin Outcomes Manag*. 2015;22(8):365-372.
26. Martin SL, Williams E, Huerth B, Robinson JD; Penobscot Nation Health Center's Diabetes Team. A pharmacy student-facilitated interprofessional diabetes clinic with the Penobscot Nation. *Prev Chronic Dis*. 2015;12:E190.
27. Moinfar Z, Sedaghat M, Abolhassani F, et al. A collaborative care program for management of common mental disorders among diabetic patients in a primary healthcare setting. *J Pub Health (Germany)*. 2016;24(4):273-279.
28. Nagelkerk J, Thompson ME, Bouthillier M, et al. Improving outcomes in adults with diabetes through an interprofessional collaborative practice program. *J Interprofessional Care*. 2018;32(1):4-13.
29. Provost S, Pineault R, Grimard D, et al. Implementation of an integrated primary care cardiometabolic risk prevention and management network in Montreal: does greater coordination of care with primary care physicians have an impact on health outcomes? *Health Promotion and Chronic Disease Prevention in Canada*. 2017;37(4):105-113.
30. Singh-Franco D, Perez A, Wolowich WR. Improvement in surrogate endpoints by a multidisciplinary team in a mobile clinic serving a low-income, immigrant minority population in South Florida. *J Health Care Poor Underserved*. 2013 Feb;24(1):67-77.
31. Watts SA, Strauss GJ, Pascuzzi K, et al. Shared medical appointments for patients with diabetes: glycemic reduction in high-risk patients. *J Am Assoc Nurse Pract*. 2015;27(8):450-456.
32. Zwar NA, Hermiz O, Comino EJ, Shortus T, Burns J, Harris M. Do multidisciplinary care plans result in better care for patients with type 2 diabetes? *Aust Fam Physician*. 2007;36(1-2):85-89.
33. Barceló A, Cafiero E, de Boer M, et al. Using collaborative learning to improve diabetes care and outcomes: the VIDA project. *Prim Care Diabetes*. 2010;4(3):145-153.
34. Cohen LB, Taveira TH, Khatana SA, Dooley AG, Pirraglia PA, Wu WC. Pharmacist-led shared medical appointments for multiple cardiovascular risk reduction in patients with type 2 diabetes. *Diabetes Educ*. 2011;37(6):801-812.
35. DePue JD, Dunsiger S, Seiden AD, et al. Nurse-community health worker team improves diabetes care in American Samoa: results of a randomized controlled trial. *Diabetes Care*. 2013;36(7):1947-1953.
36. Edelman D, Fredrickson SK, Melnyk SD, et al. Medical clinics versus usual care for patients with both diabetes and hypertension: a randomized trial. *Ann Intern Med*. 2010;152(11):689-696.
37. Goyer L, Dufour R, Janelle C, et al. Randomized controlled trial on the long-term efficacy of a multifaceted, interdisciplinary lifestyle intervention in reducing cardiovascular risk and improving lifestyle in patients at risk of cardiovascular disease. *J Behav Med*. 2013;36(2):212-224.
38. Liou JK, Soon MS, Chen CH, et al. Shared care combined with telecare improves glycemic control of diabetic patients in a rural underserved community. *Telemed J E Health*. 2014;20(2):175-178.
39. Maislos M, Weisman D. Multidisciplinary approach to patients with poorly controlled type 2 diabetes mellitus: a prospective, randomized study. *Acta Diabetol*. 2004;41(2):44-48.
40. Pimazoni-Netto A, Rodbard D, Zanella MT. Rapid improvement of glycemic control in type 2 diabetes using weekly intensive multifactorial interventions: structured glucose monitoring, patient education, and adjustment of therapy—a randomized controlled trial. *Diabetes Technol Ther*. 2011;13(10):997-1004.
41. Ramli AS, Selvarajah S, Daud MH, et al. Effectiveness of the EMPOWER-PAR intervention in improving clinical outcomes of type 2 diabetes mellitus in primary care: a pragmatic cluster randomised controlled trial. *BMC Fam Pract*. 2016;17(1):157.
42. Tang PC, Overhage JM, Chan AS, et al. Online disease management of diabetes: engaging and motivating patients online with enhanced resources—diabetes (EMPOWER-D), a randomized controlled trial. *J Am Med Inform Assoc*. 2013;20(3):526-534.
43. Taveira TH, Friedmann PD, Cohen LB, et al. Pharmacist-led group medical appointment model in type 2 diabetes. *Diabetes Educ*. 2010;36(1):109-117.
44. Taylor KI, Oberle KM, Crutcher RA, Norton PG. Promoting health in type 2 diabetes: nurse-physician collaboration in primary care. *Biol Res Nurs*. 2005;6(3):207-215.
45. Tourkmani AM, Abdelhay O, Alkhashan HI, et al. Impact of an integrated care program on glycemic control and cardiovascular risk factors in patients with type 2 diabetes in Saudi Arabia: an interventional parallel-group controlled study. *BMC Family Practice*. 2018;19(1):1.
